# Supplementary material
Source: PubMed Central journal article supplement (PMC9978616)

**Figure 2: A Conceptual Model of Champion Impact with Additional Dimensions**

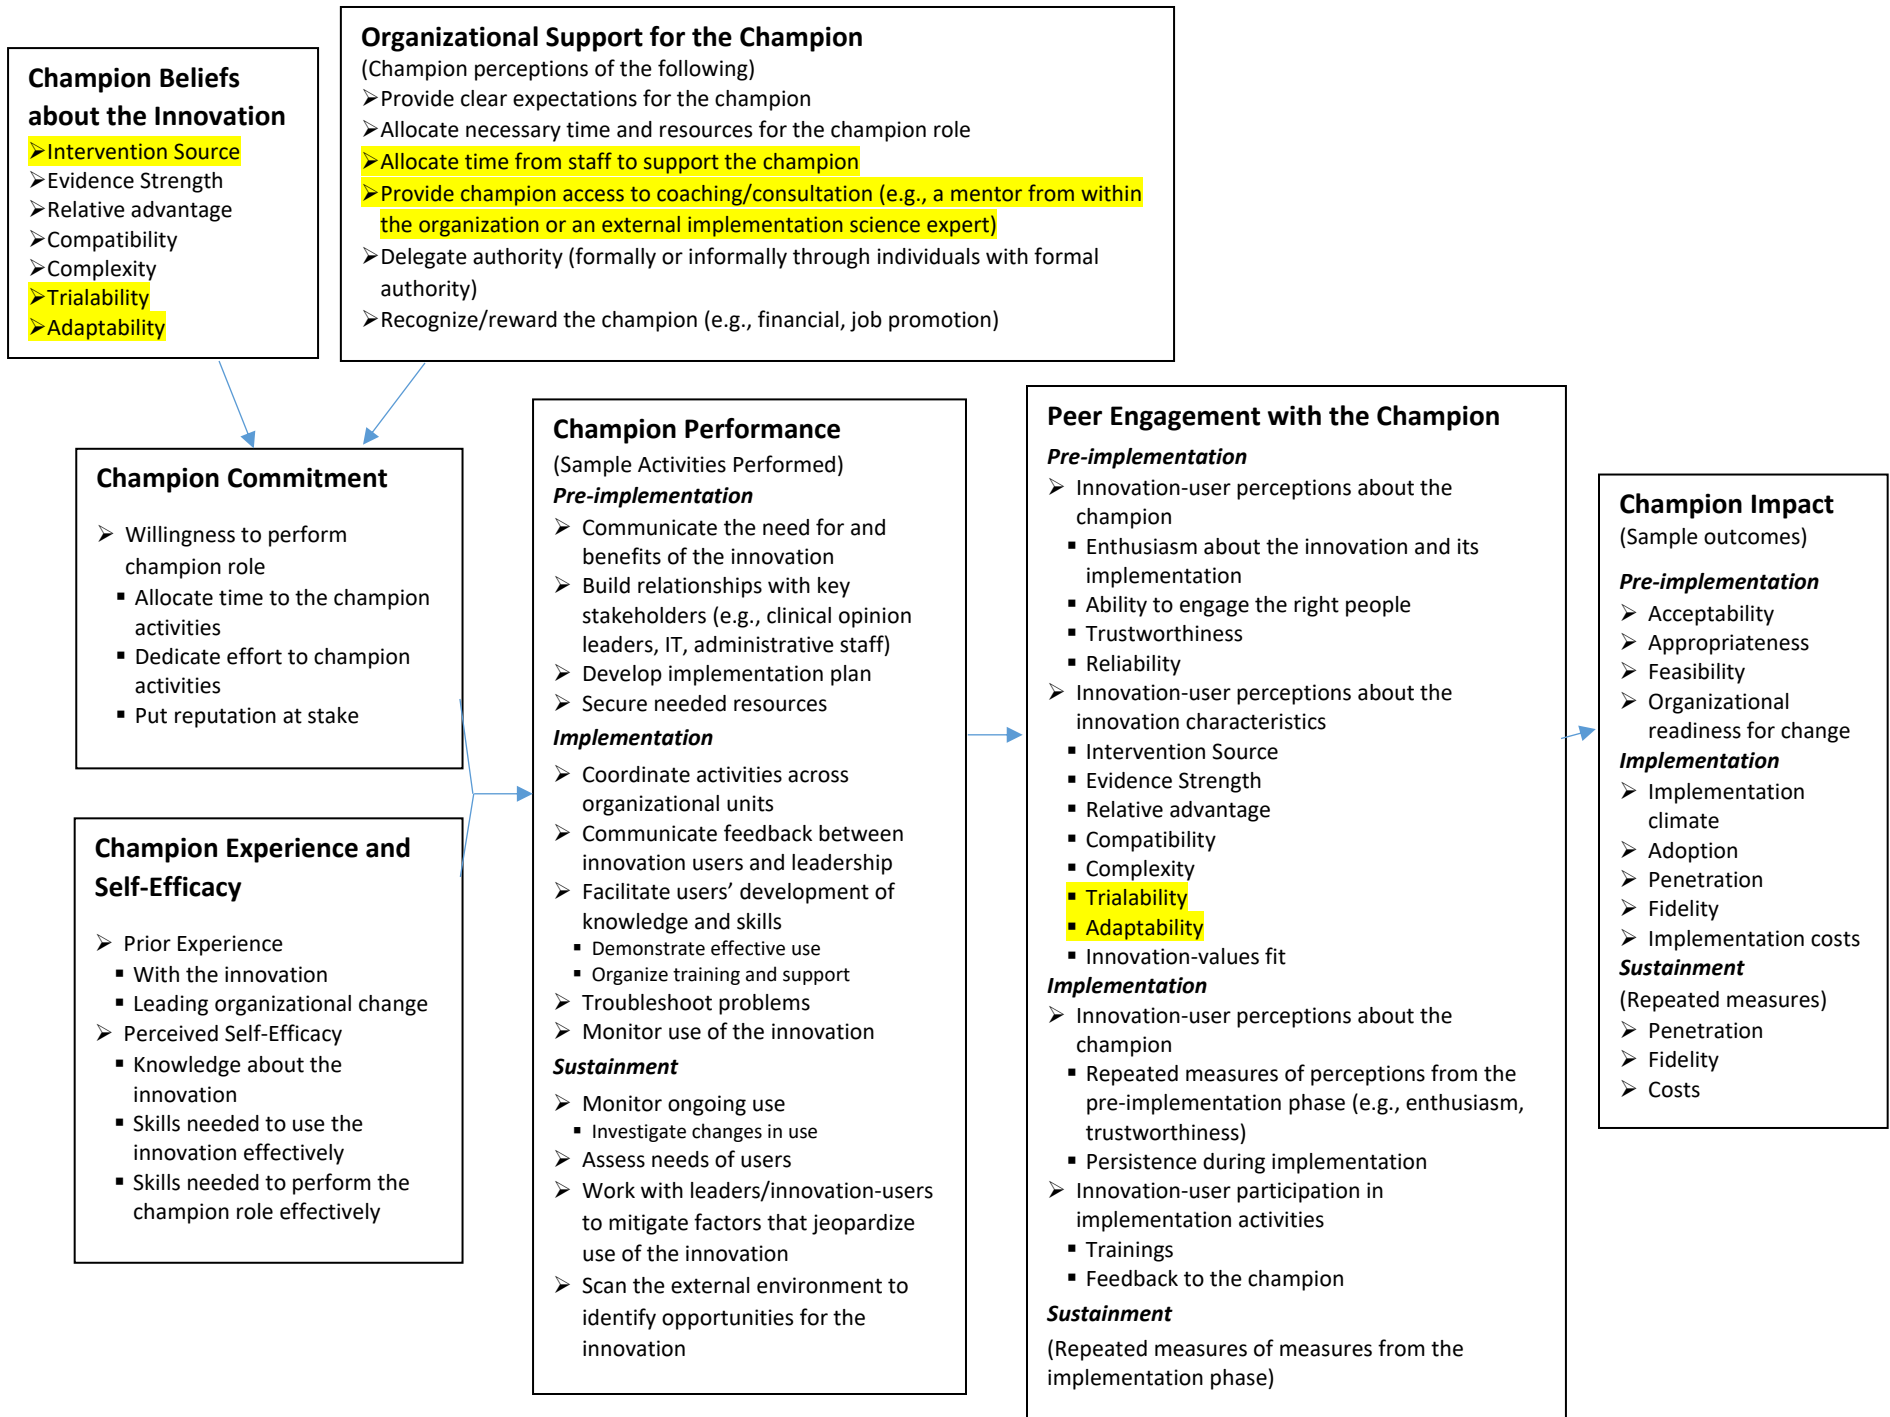

Supplement: sj-pdf-1-irp-10.1177_2633489521990443.pdf [file sj-pdf-1-irp-10.1177_2633489521990443.pdf]
